# Supplementary material for: Ultra-high-throughput microbial community analysis on the Illumina HiSeq and MiSeq platforms
Source: Oxford University Press journal article supplement (doi:10.1038/ismej.2012.8), 2012-03-08
Supplement: 41396_2012_bfismej20128_moesm80_esm.pdf [file 41396_2012_bfismej20128_moesm80_esm.pdf]

(A) 100,000 sequences/sample

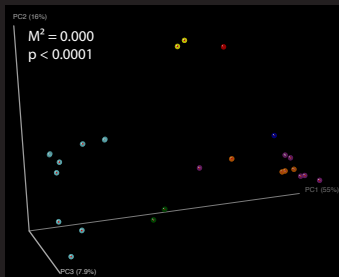

(B) 10,000 sequences/sample

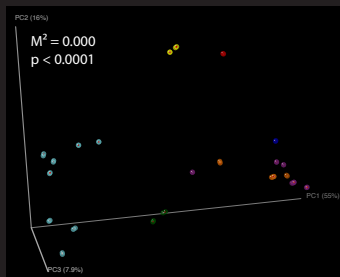

(C) 1,000 sequences/sample

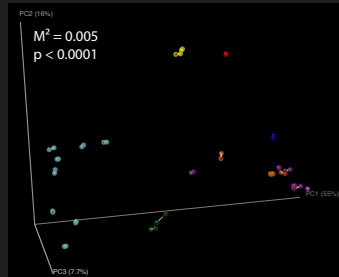

(D) 100 sequences/sample

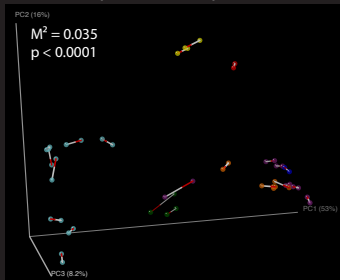

(E) 10 sequences/sample

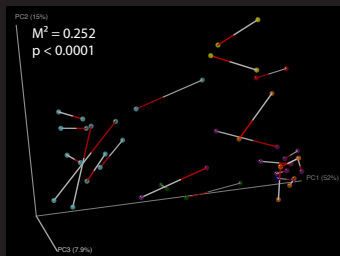

(F) 1 sequence/sample

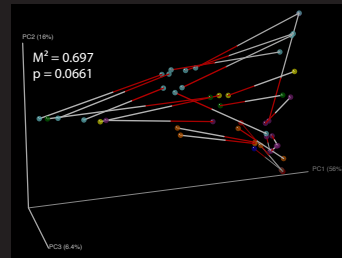

Soil

Human (oral)

Human (feces)

Human (skin)

Canine (oral)

Canine (feces)

Canine (skin)
