# Supplementary material for: Ultra-high-throughput microbial community analysis on the Illumina HiSeq and MiSeq platforms
Source: Oxford University Press journal article supplement (doi:10.1038/ismej.2012.8), 2012-03-08
Supplement: 41396_2012_bfismej20128_moesm82_esm.xls [file 41396_2012_bfismej20128_moesm82_esm.xls]

## Sheet: Sheet1
	Before quality filter	Before quality filter minus PhiX control	After quality filter
HiSeq 5' (lane 6)	49757529	49757529	43227611
HiSeq 3' (lane 6)	49757529	49757529	22928291
HiSeq 5' (lane 7)	41210187	41210187	36106618
HiSeq 3' (lane 7)	41210187	41210187	29449228
HiSeq 5' (lane 8)	42098019	42098019	36833727
HiSeq 3' (lane 8)	42098019	42098019	32457585
MiSeq 5'	4920833	2.60804e+06	1685243
MiSeq 3'	4920833	2.60804e+06	1603532
