# Supplementary material for: Ultra-high-throughput microbial community analysis on the Illumina HiSeq and MiSeq platforms
Source: Oxford University Press journal article supplement (doi:10.1038/ismej.2012.8), 2012-03-08
Supplement: 41396_2012_bfismej20128_moesm83_esm.doc [file 41396_2012_bfismej20128_moesm83_esm.doc]

Supplementary Information

Supplementary File 1. PCR and sequencing primers, including 2,167 valid Golay barcoded reverse PCR primers.

Supplementary File 2. Sequence counts for all lanes before and after quality filtering. The MiSeq run included sequencing of a PhiX control.

Supplementary Figure 1: Procrustes comparison of beta diversity conclusions at different sampling depths (all comparisons bases on 5’ reads from HiSeq lane 6).

Supplementary Methods: Details on sequencing primers and protocol, read quality control, and bioinformatics.
